# Supplementary material for: Efficient microwave-assisted regioselective one pot direct ortho-formylation of phenol derivatives in the presence of nanocrystalline MgO as a solid base catalyst under solvent-free conditions
Source: Royal Society of Chemistry journal article supplement (doi:10.1039/c7nj04794k), 2018-01-01

## Efficient microwave assisted regioselective one pot direct ortho-formylation of phenol derivatives in the presence of MgO nano crystallines as solid base catalyst under solvent free conditions

Hossein Naeimi\* <sup>a</sup> and Elham Zakerzadeh <sup>a</sup>

Department of Organic Chemistry, Faculty of Chemistry, University of Kashan, Kashan,

87317-51167, I.R. Iran; Fax: +98-03155912397; Tel: +98-03155912388;

E-mail: naeimi@kashanu.ac.ir

Spectra of 2-hydroxy-5-methyl benzaldehyde

FT IR

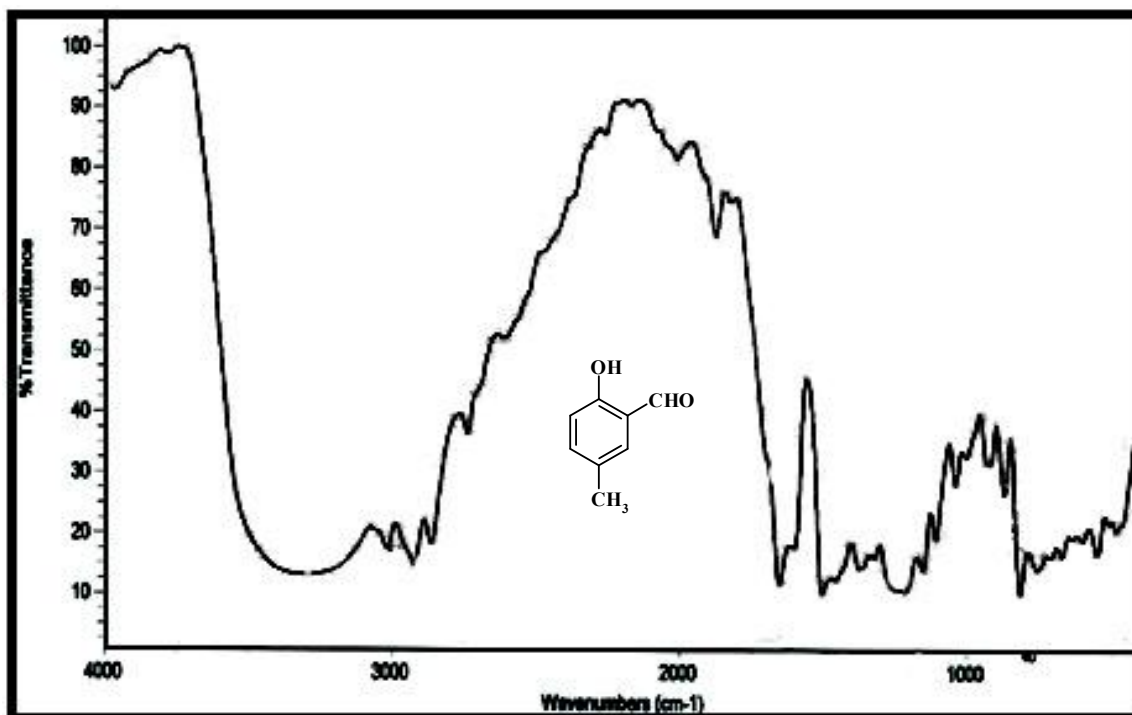

# $^1\text{H NMR}$

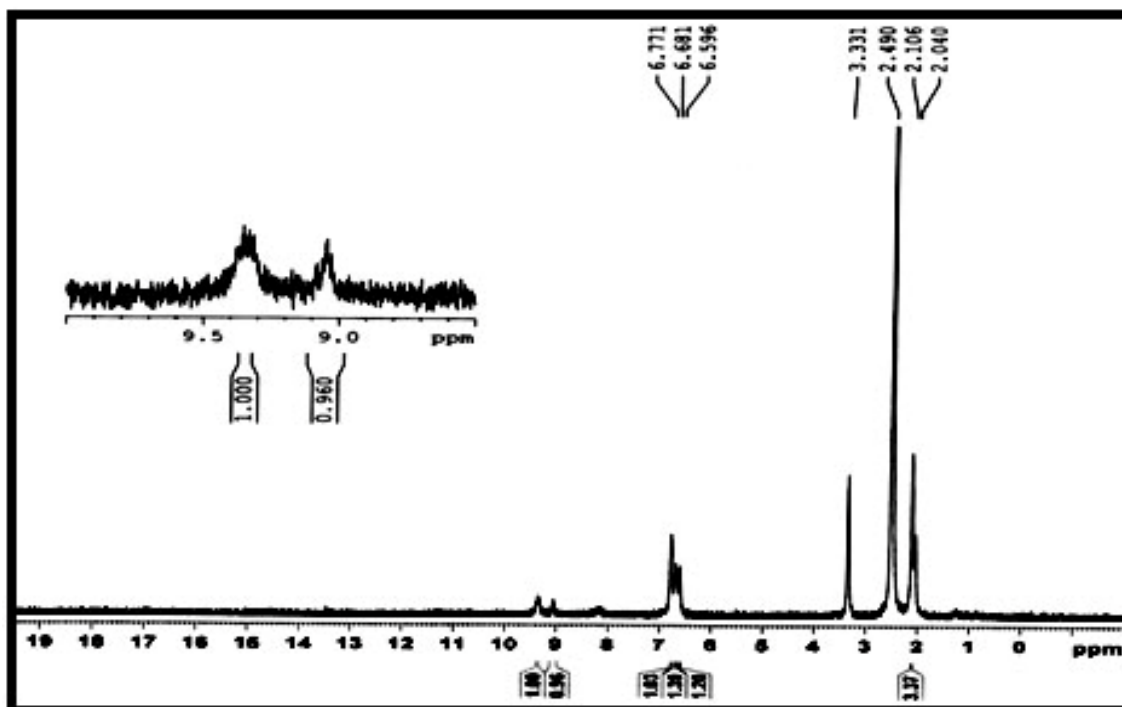

Spectra of 2-hydroxy 5-ethyl benzaldehyde

## FT IR

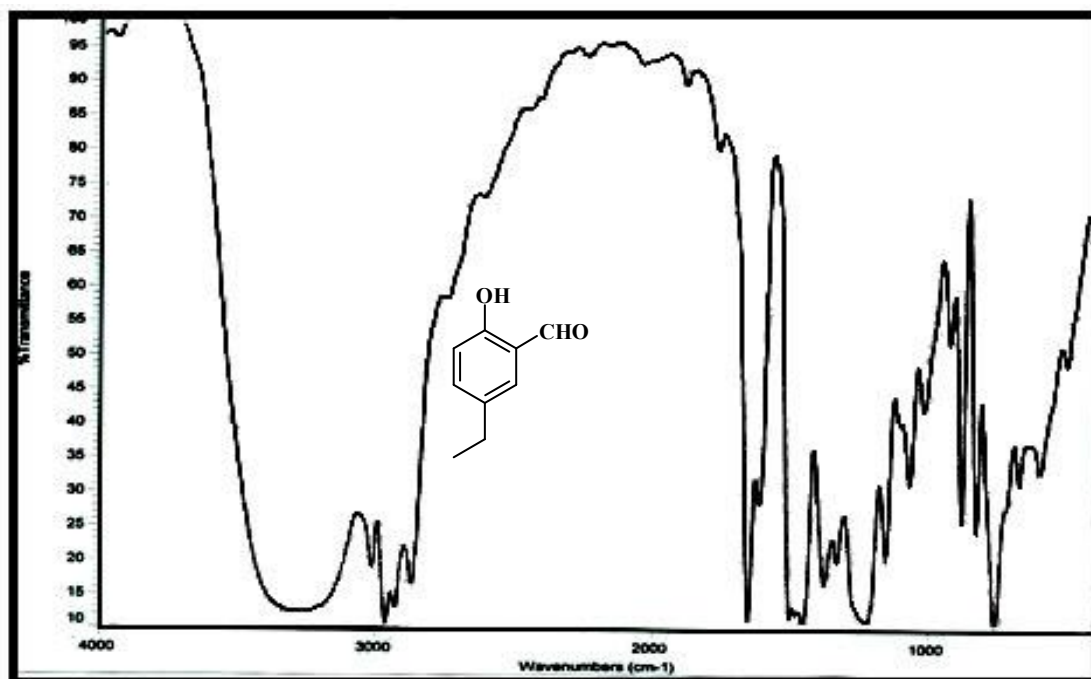

# $^1\text{H NMR}$

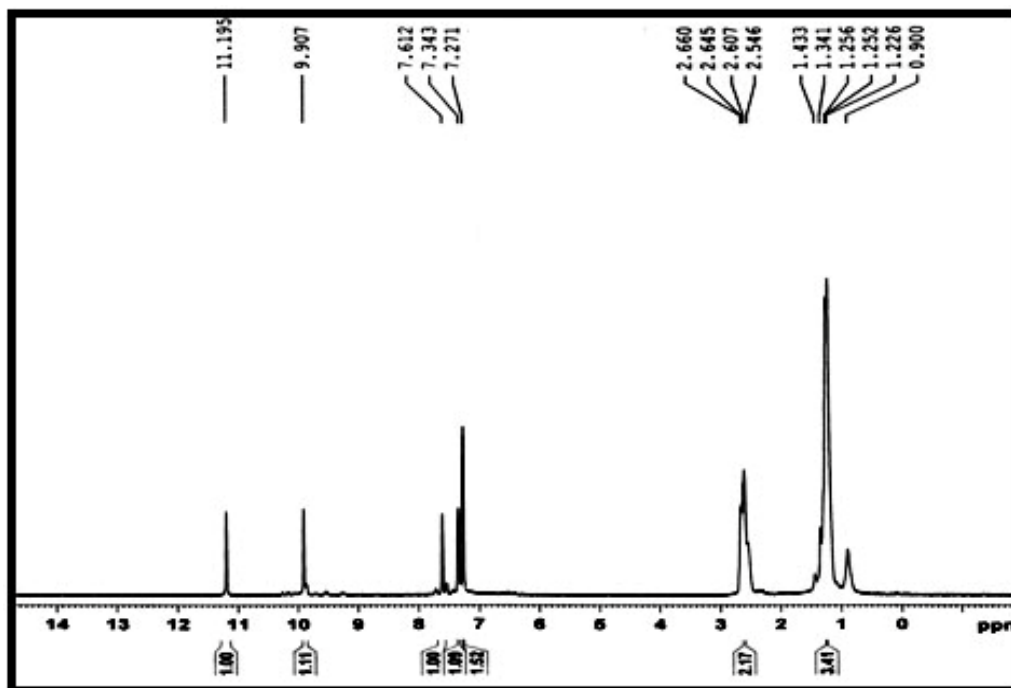

Spectra of 2-hydroxy-3, 5-ditertbutyl benzaldehyde

# FT IR

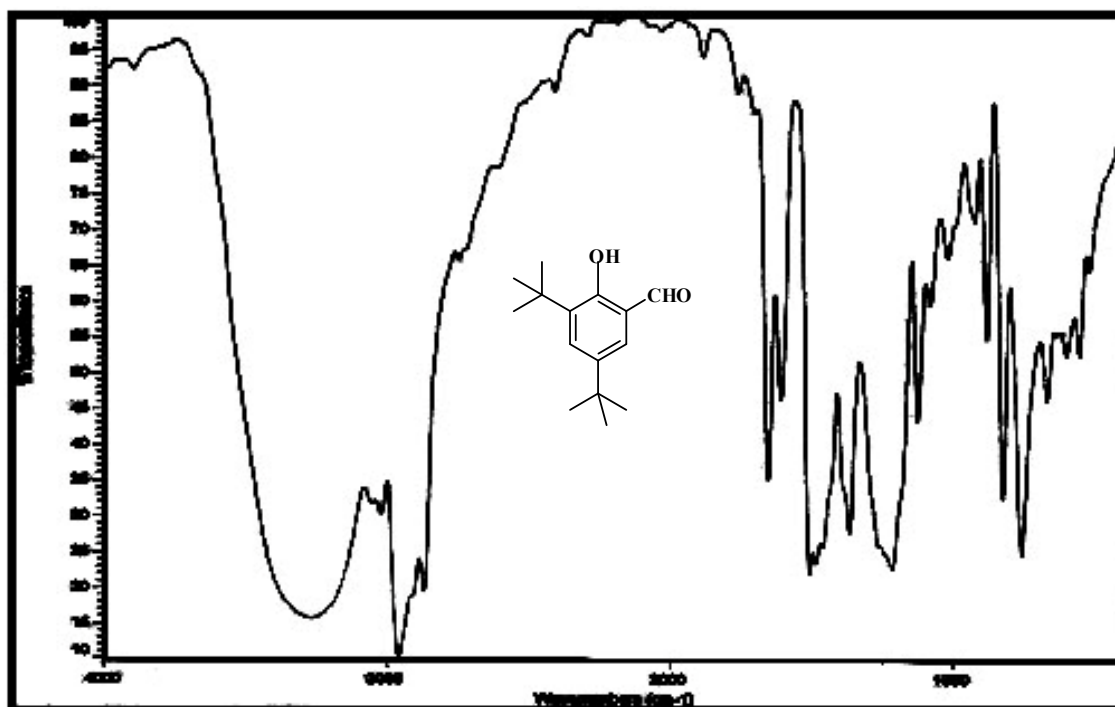

$^1\text{H NMR}$

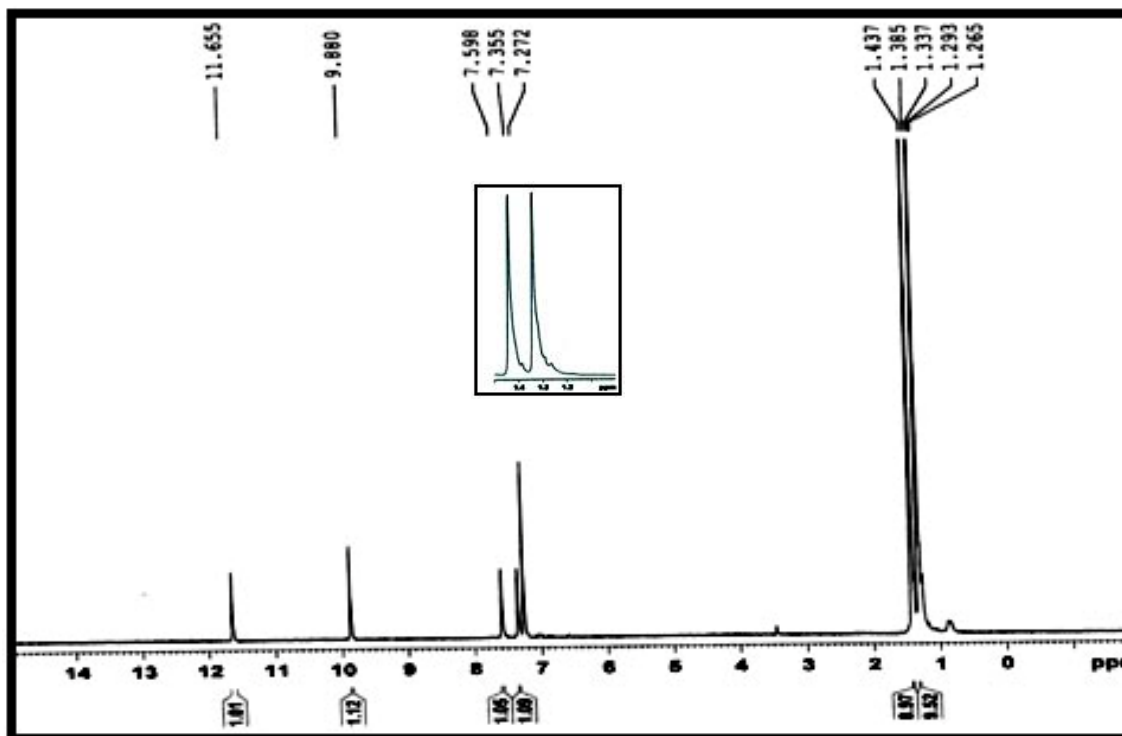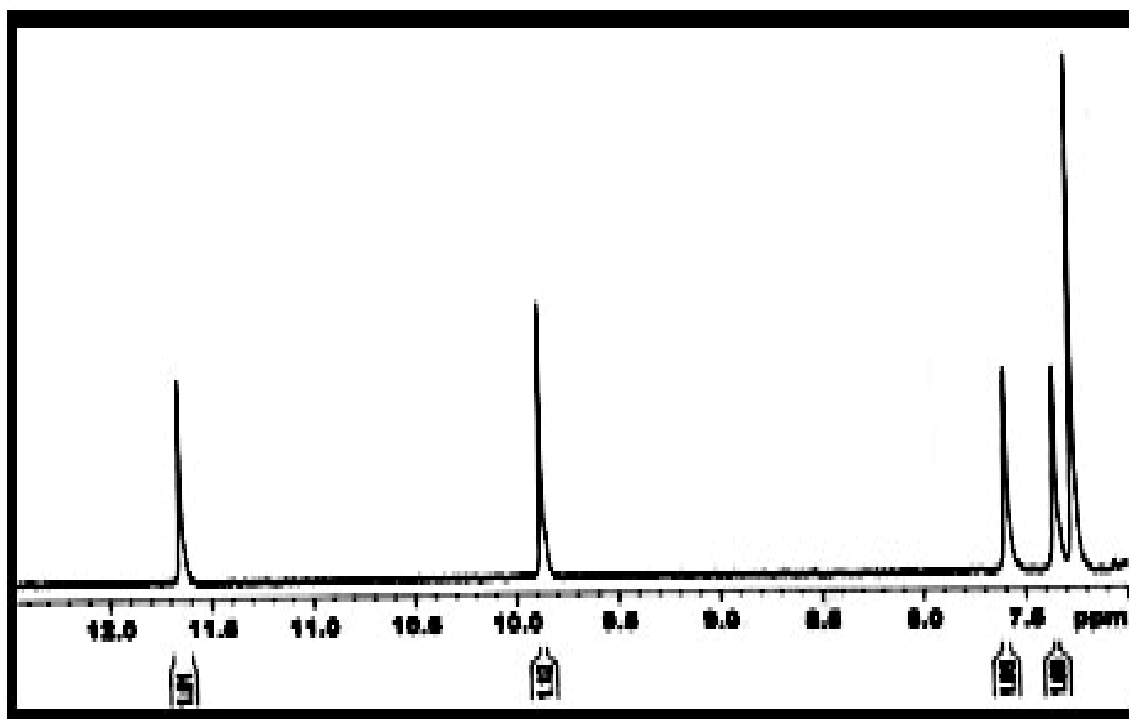

# Spectra of 2-hydroxy naphthaldehyde

## FT IR

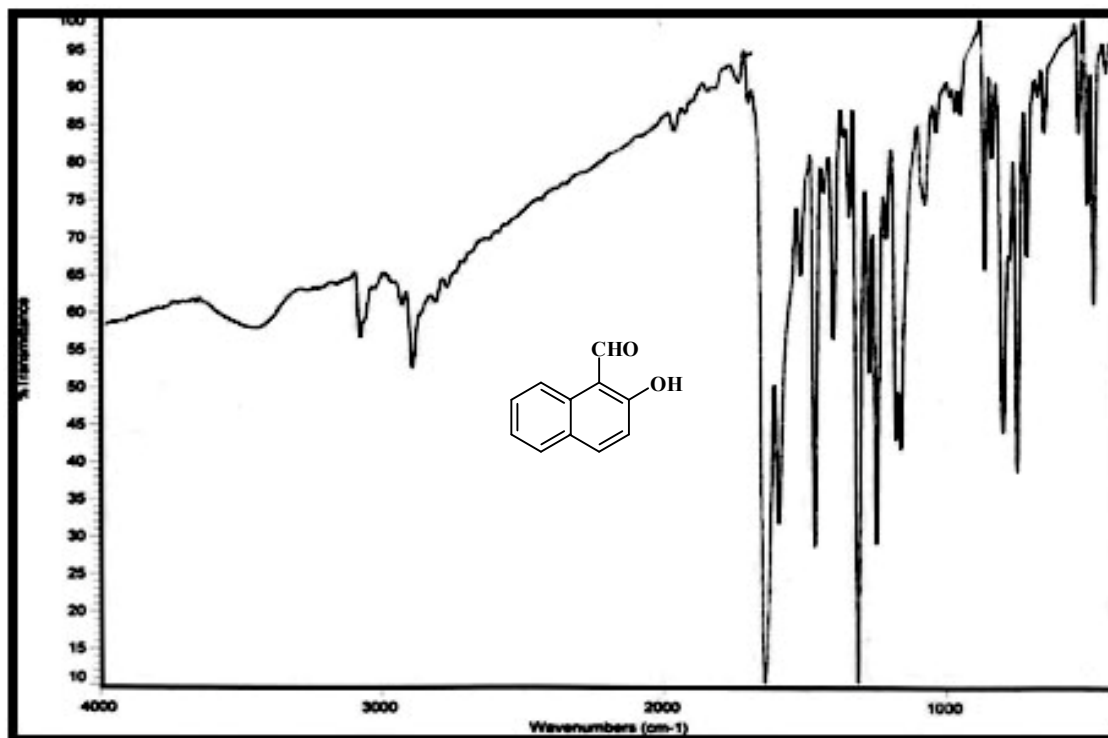

## <sup>1</sup>H NMR

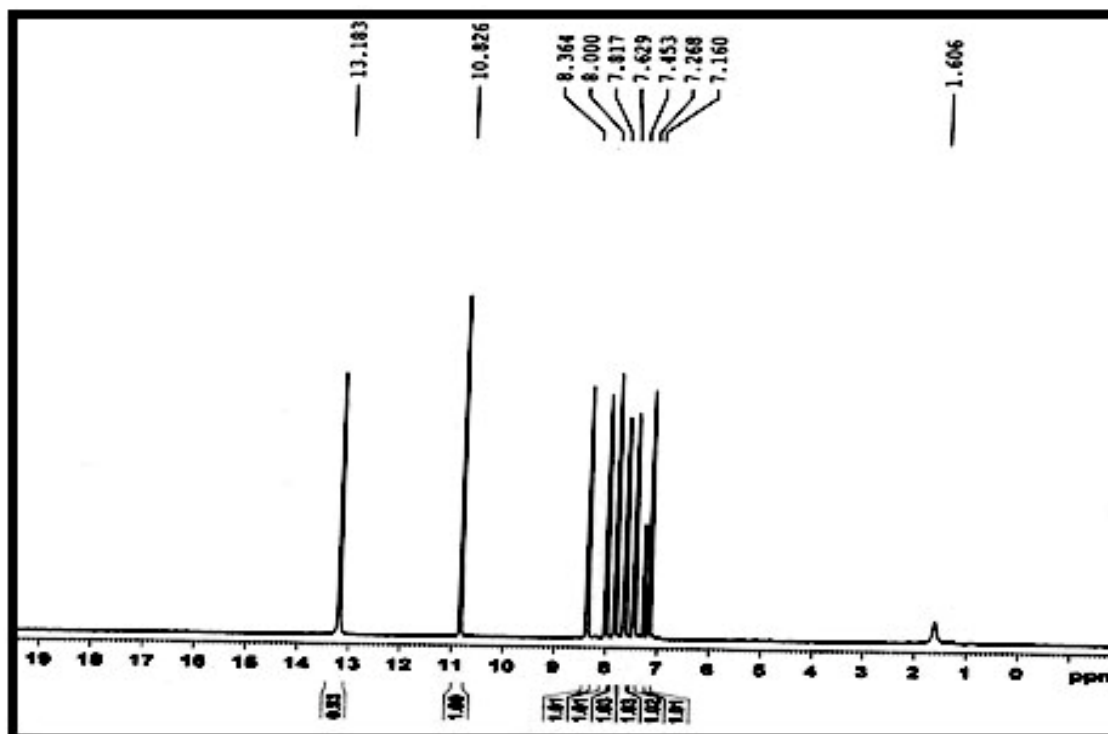

# $^{13}\text{C}$ NMR

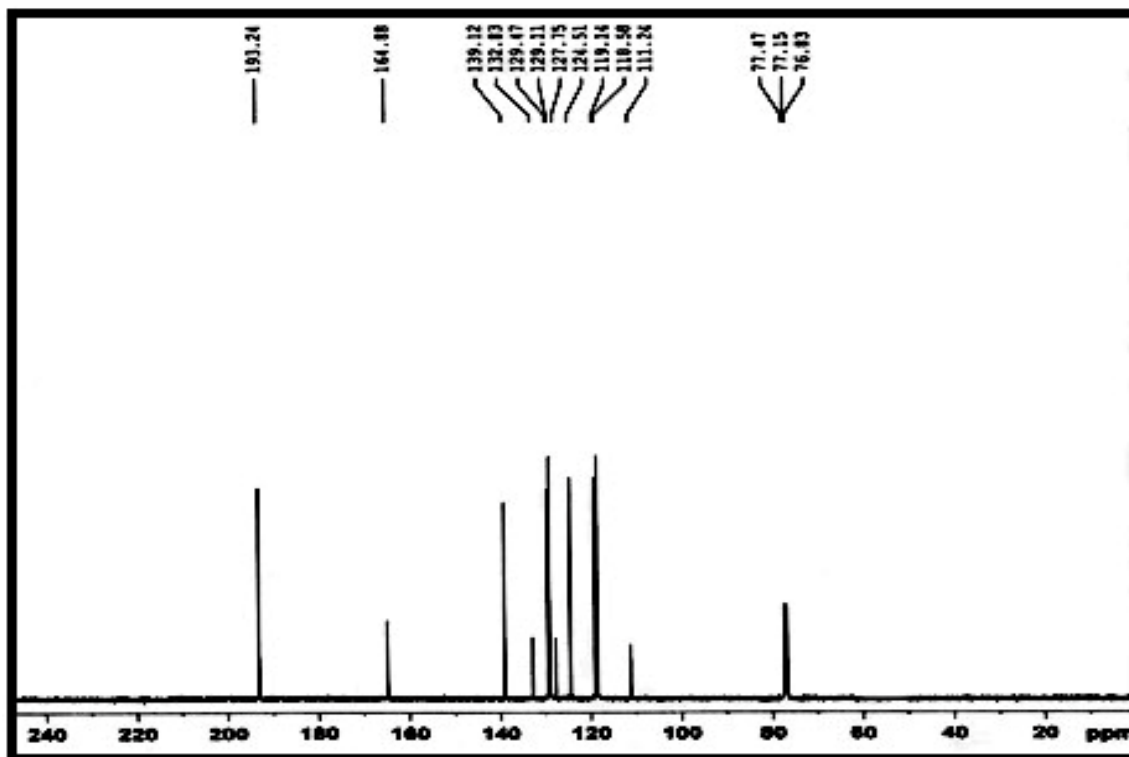

Spectra of 2, 3-dihydroxy benzaldehyde

FT IR

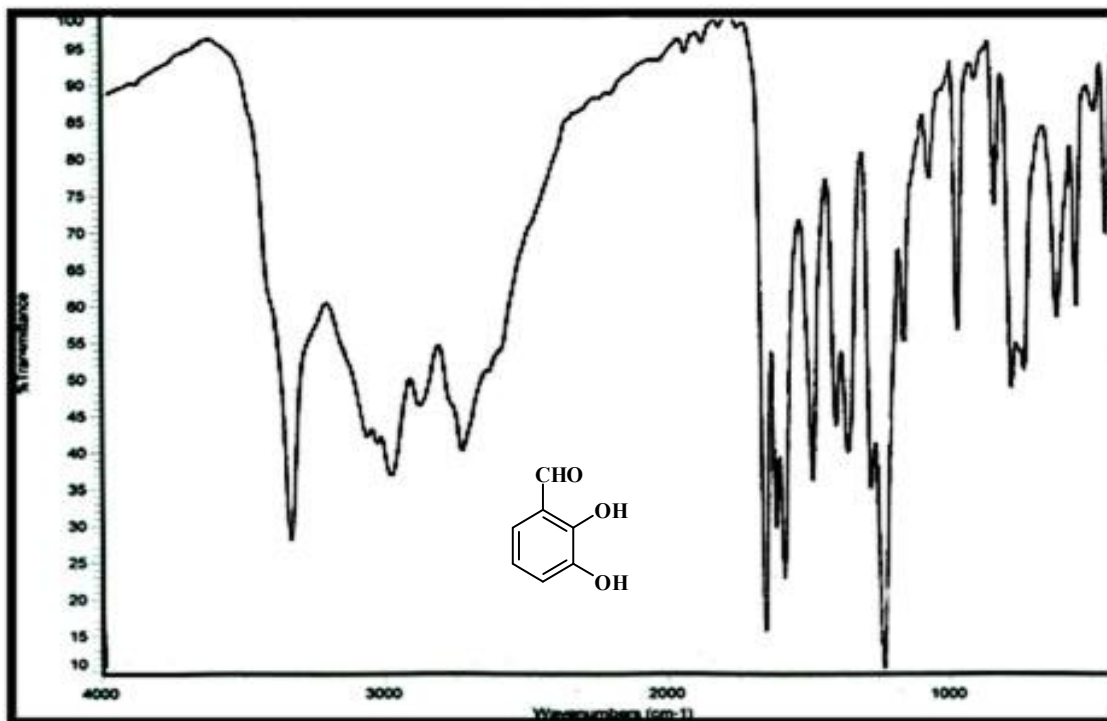

# $^1\text{H}$ NMR

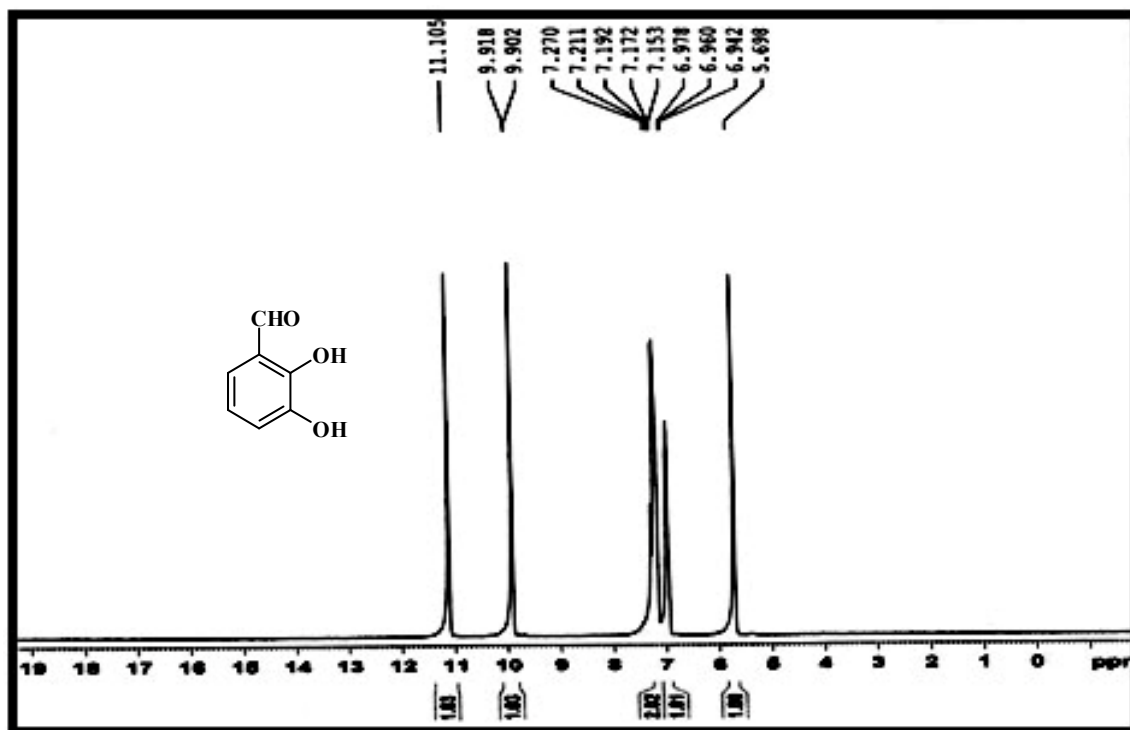

# $^{13}\text{C}$ NMR

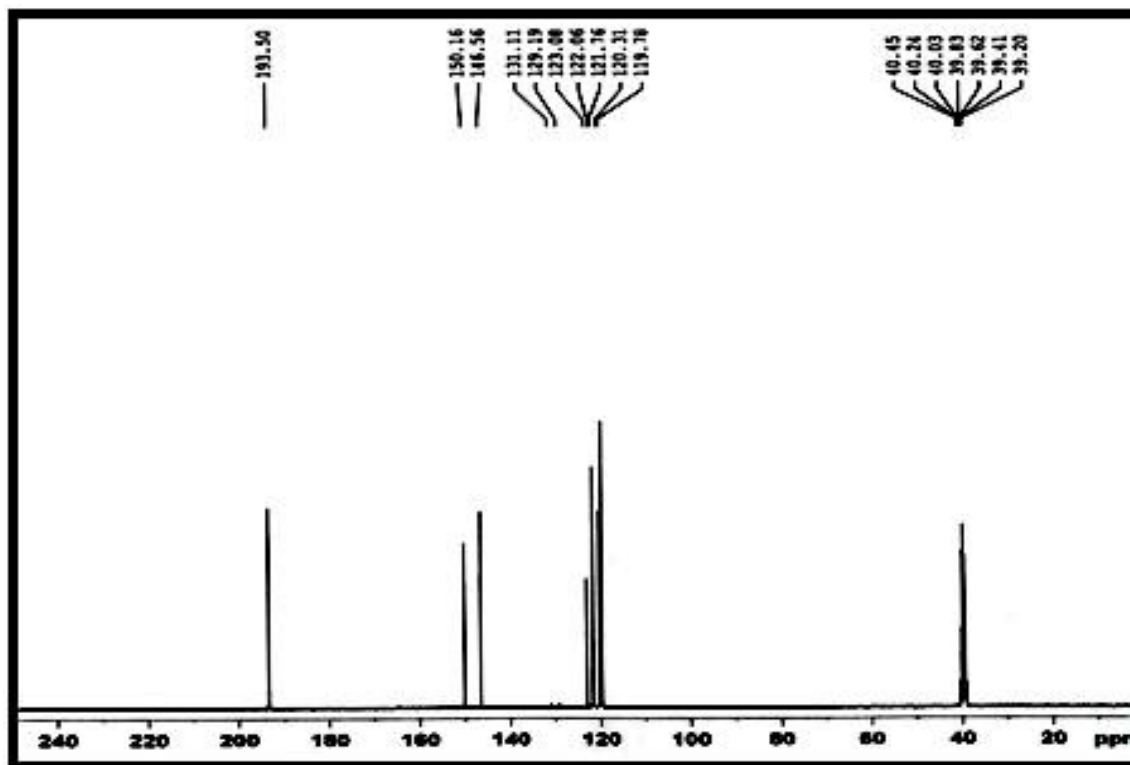

# Spectra of 2,4-dihydroxy benzaldehyde

## FT IR

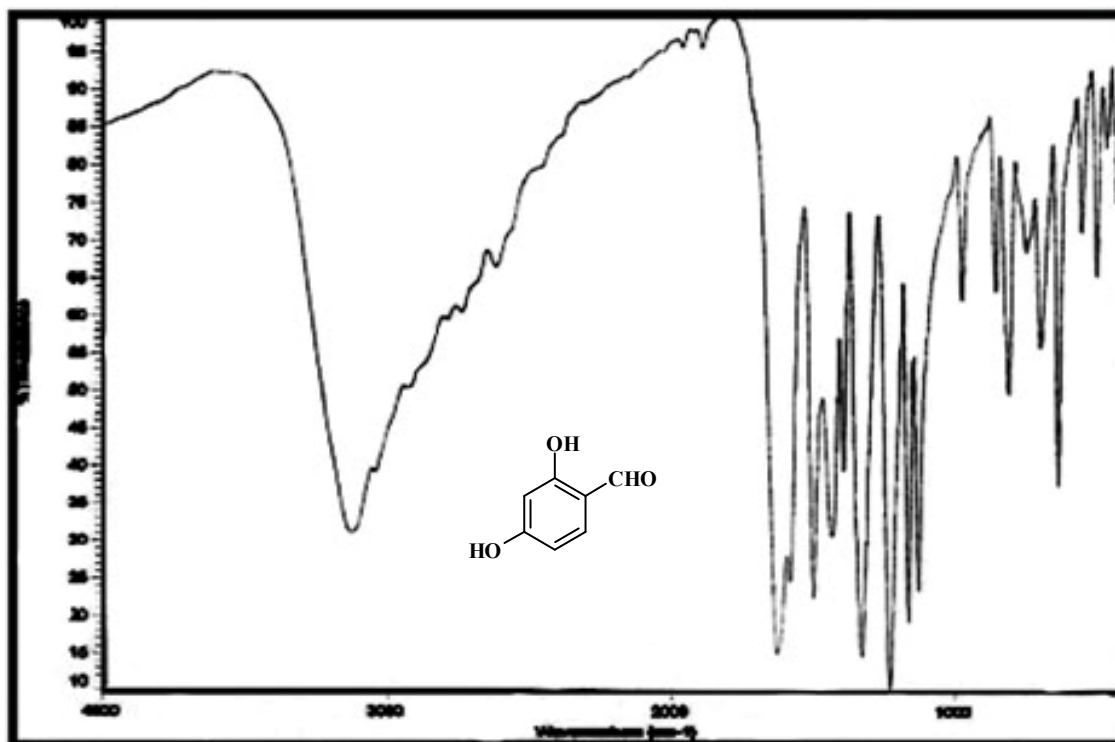

## <sup>1</sup>H NMR

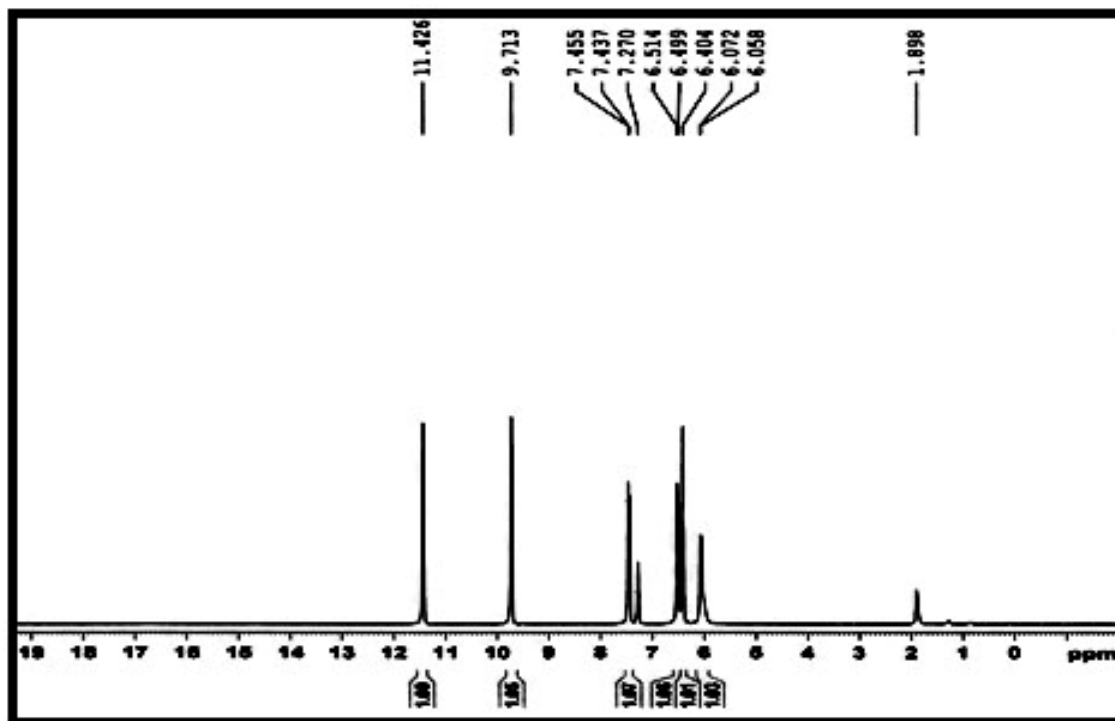



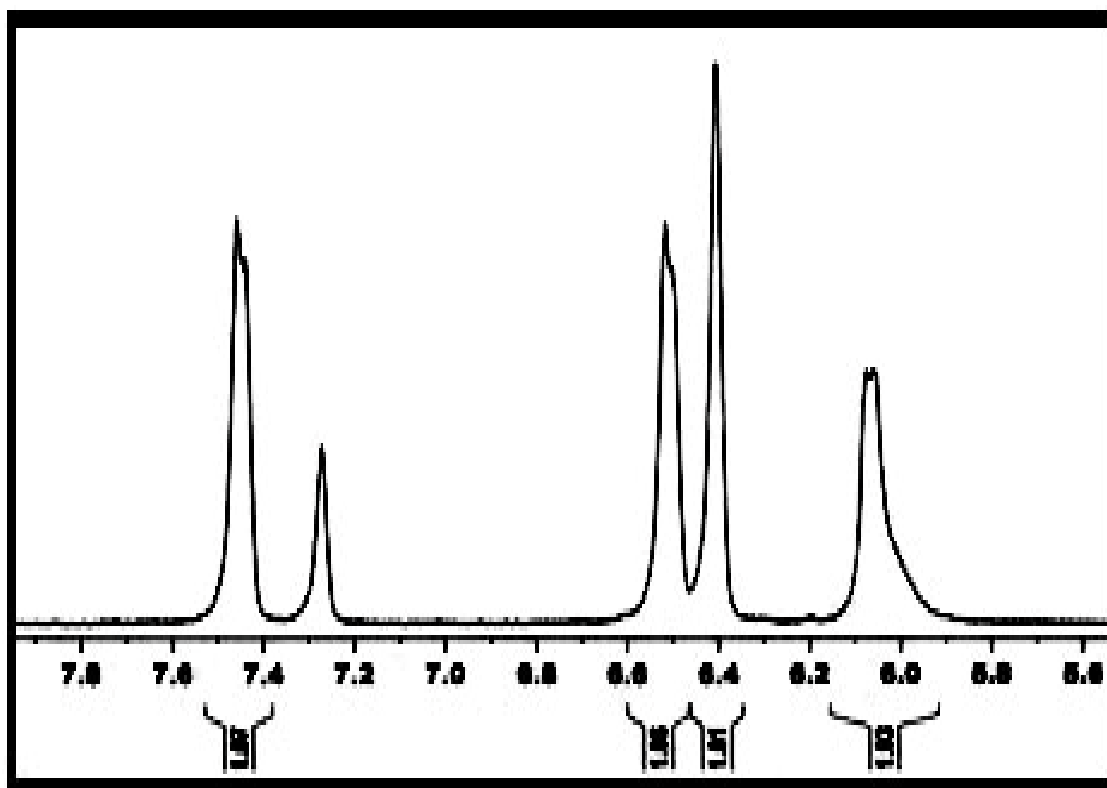

<sup>13</sup>C NMR

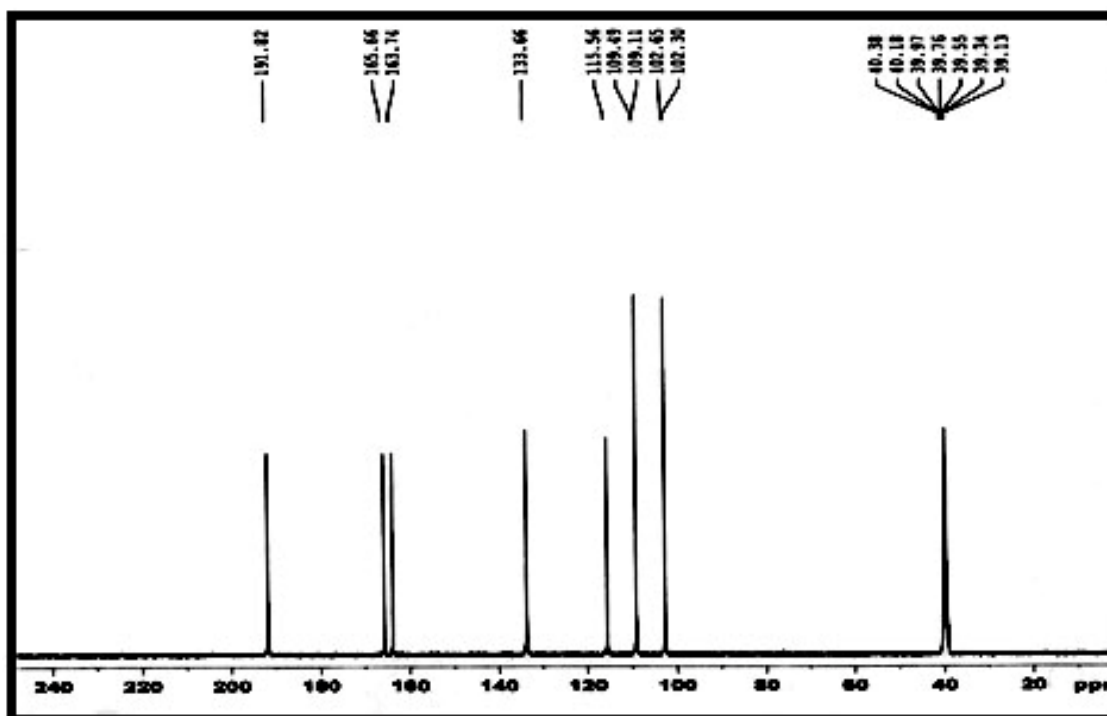

# Spectra of 2, 5-dihydroxy benzaldehyde

## FT IR

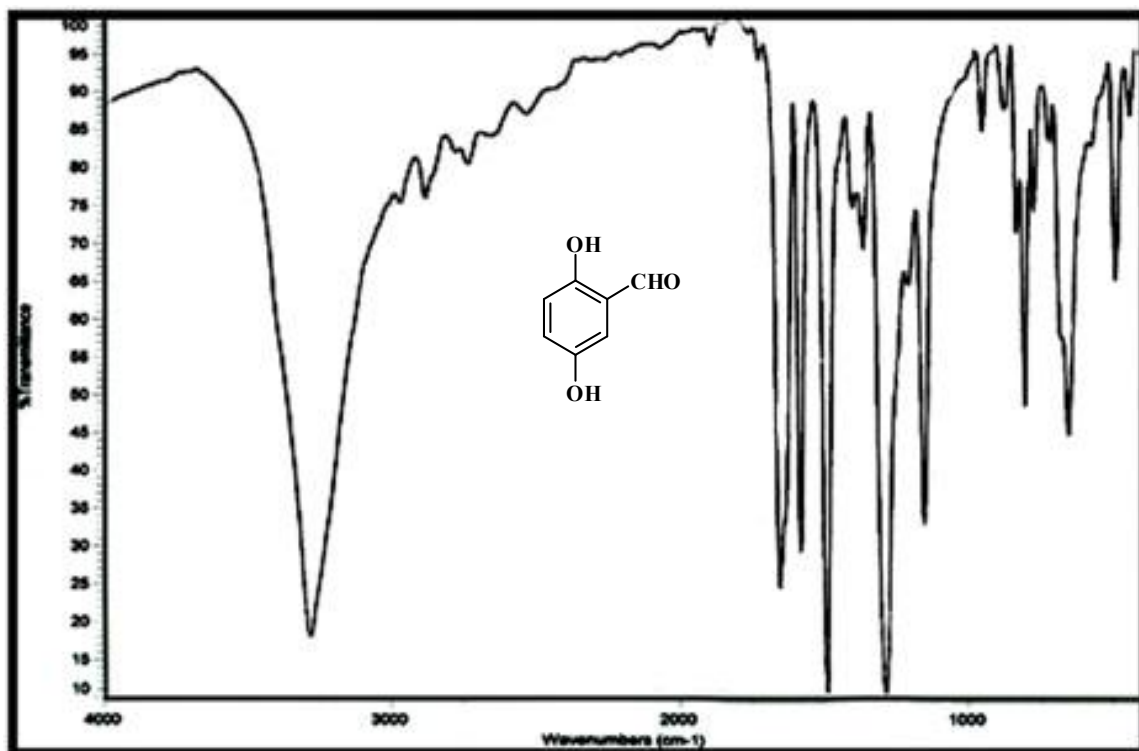

## <sup>1</sup>H NMR

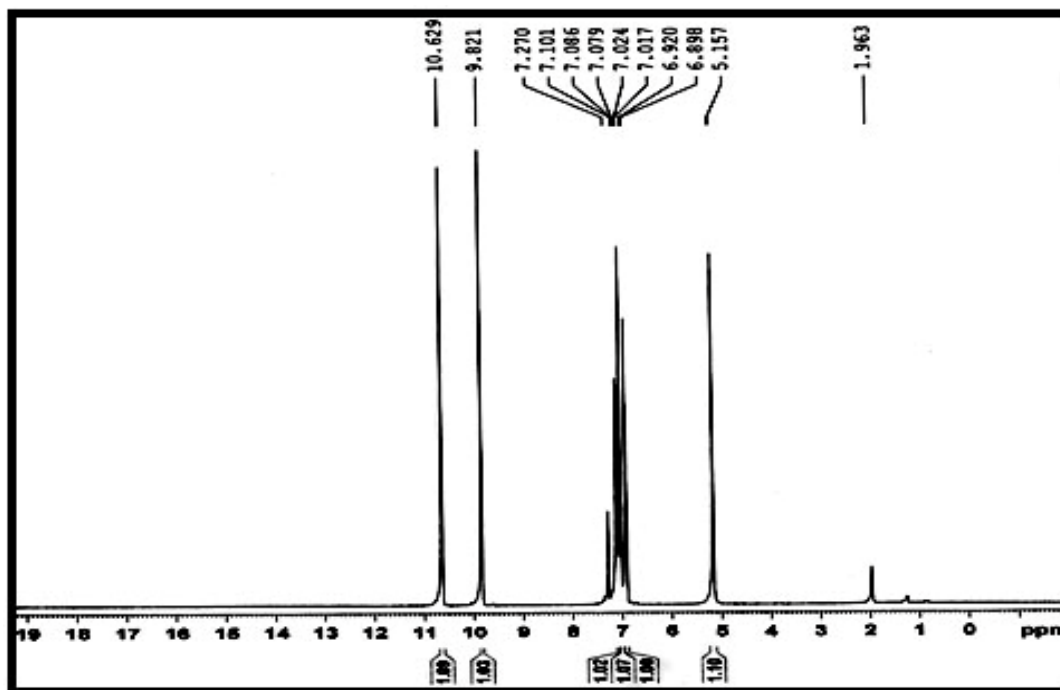

$^{13}\text{C}$  NMR

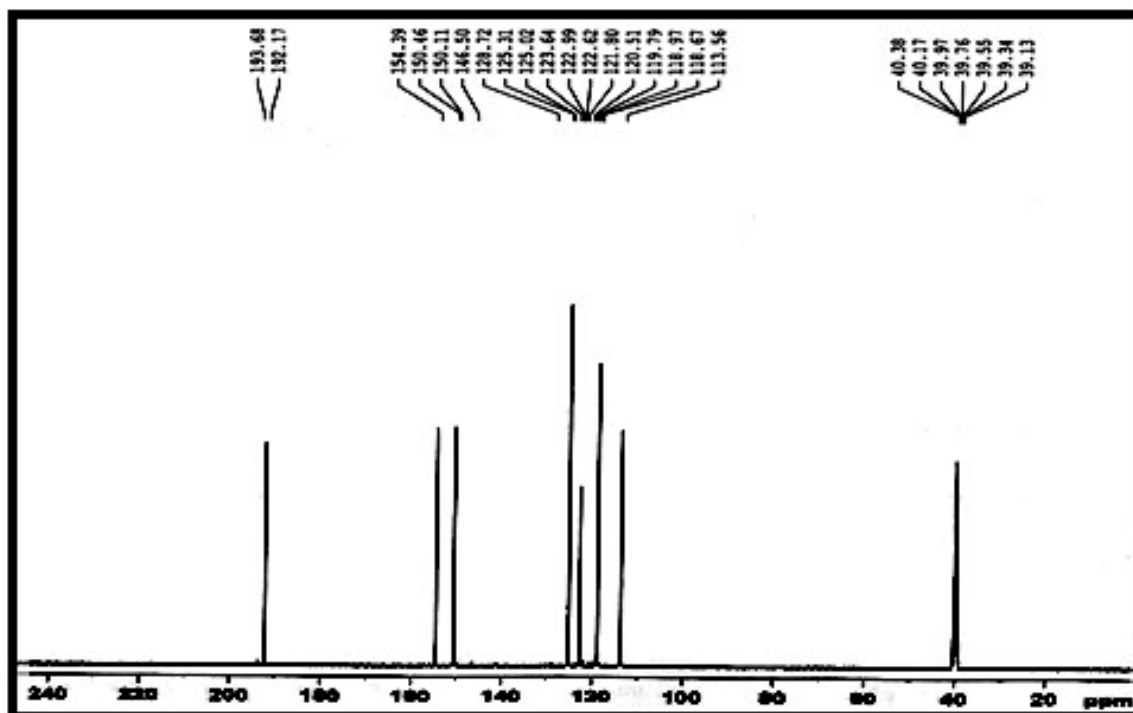

Supplement: c7nj04794k1.pdf [file c7nj04794k1.pdf]
